# Supplementary material for: Preparation and characterization of polyamide 6 fibre based on a phosphorus-containing flame retardant
Source: Royal Society of Chemistry journal article supplement (doi:10.1039/c7ra13228j), 2018-01-01
Supplement: c7ra13228j1.pdf [file c7ra13228j1.pdf]

**Preparation and characterization of polyamide 6 fibre based on phosphorus-containing  
flame retardant**

*Ke Liu, Yuanyuan Li, Lei Tao and Ru Xiao\**

State Key Laboratory for Modification of Chemical Fibers and Polymer Materials, College of  
Materials Science and Engineering, Donghua University, Shanghai 201620, P. R. China

\*E-mail: [xiaoru@dhu.edu.cn](mailto:xiaoru@dhu.edu.cn)

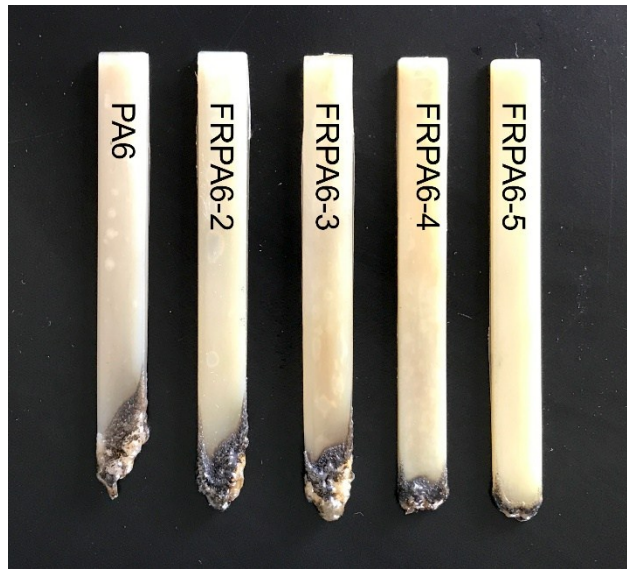

**Figure S1.** The photograph of PA6 and FRPA6 resins after vertical burning test

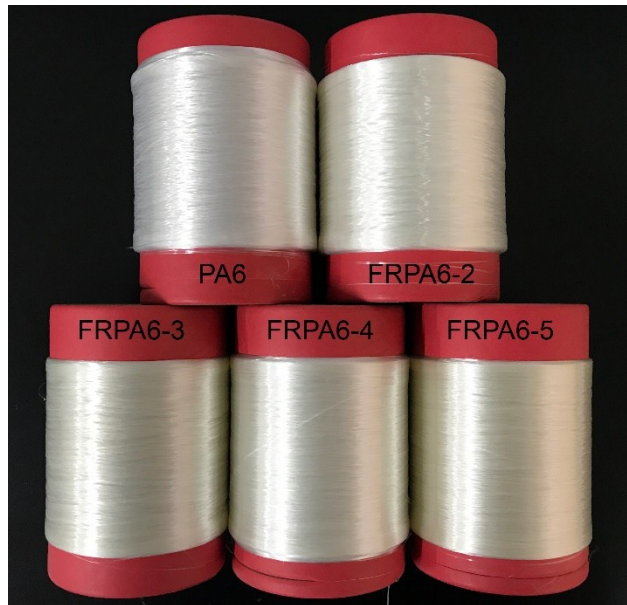

**Figure S2.** The photograph of PA6 and FRPA6 fibres

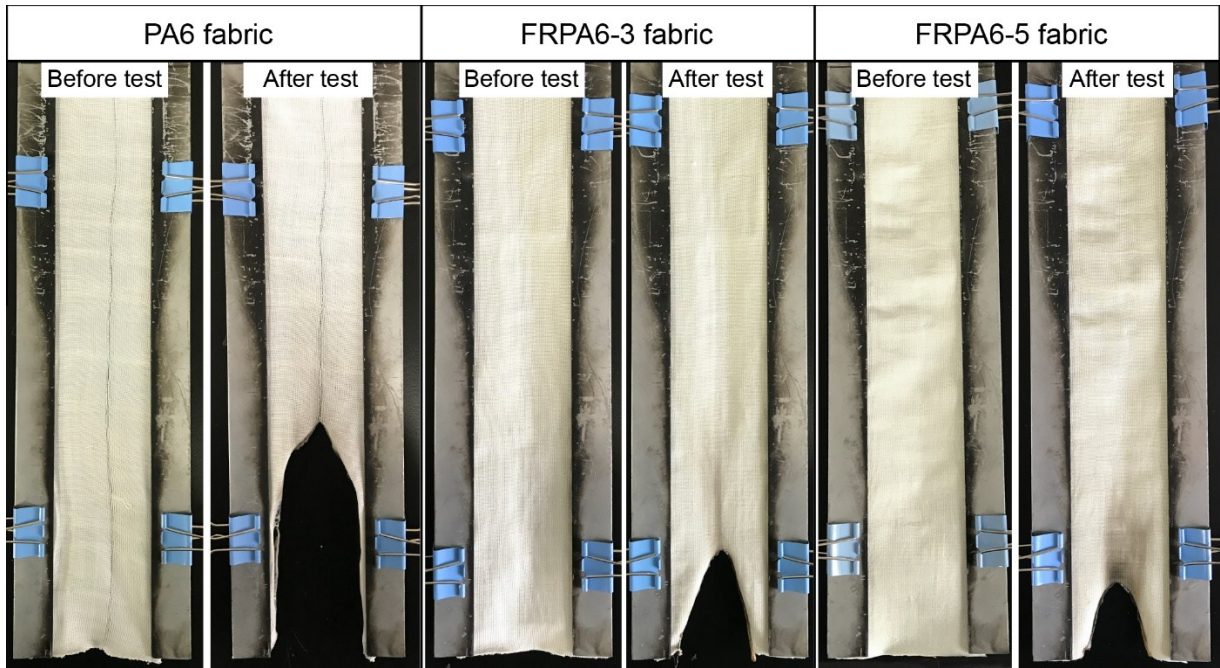

**Figure S3.** The photograph of PA6 and FRPA6 fabrics before and after vertical burning test
